# Supplementary material for: Accurate state energetics in spin-crossover systems using pure density functional theory
Source: Royal Society of Chemistry journal article supplement (doi:10.1039/d4dt00975d), 2024-01-01
Supplement: d4dt00975d1.xlsx [file d4dt00975d1.xlsx]

## Sheet: Sheet1
		PBE+MB	R2SCAN	KTBM24	DFT optimized		Exp
Cr1	I1	3.024	3.045	3.004	distances in		3.068
Cr1	I2	3.024	3.045	3.004	Angstroms		3.068
Cr1	P1	2.47144	2.50174	2.50593			2.503
Cr1	P2	2.47202	2.50219	2.50593			2.503
Cr1	P3	2.47904	2.51078	2.5107			2.532
Cr1	P4	2.4798	2.51126	2.51071			2.532
1
Cr1	I1	2.71537	2.73365	2.72539
Cr1	I2	2.71438	2.73317	2.72503
Cr1	P1	2.38782	2.41071	2.41339
Cr1	P2	2.38818	2.4107	2.41338
Cr1	P3	2.3925	2.41926	2.42057
Cr1	P4	2.39334	2.41942	2.42051
Mn1	N1	2.1983	2.19692	2.19147
Mn1	N2	1.98215	1.98046	1.97963
Mn1	N3	1.97866	1.97831	1.97461
Mn1	N4	2.33135	2.31629	2.30649
Mn1	N5	2.05345	2.05562	2.05644
Mn1	N6	2.03506	2.03634	2.03905
2
Mn1	N1	1.96775	1.96665	1.96839			1.975
Mn1	N2	1.95185	1.94978	1.94977			1.975
Mn1	N3	1.95141	1.94828	1.95255			1.975
Mn1	N4	2.00702	2.01306	2.02535			2.0267
Mn1	N5	1.99451	1.99834	2.01108			2.0267
Mn1	N6	2.00804	2.014	2.01716			2.0267
Mn1	N1	2.08124	2.08193	2.08436			2.094
Mn1	N2	2.30734	2.27406	2.27807			2.159
Mn1	N3	2.30735	2.27407	2.27803			2.178
Mn1	N4	2.08122	2.08191	2.08439			2.053
Mn1	O1	1.87517	1.87147	1.85857			1.869
Mn1	O2	1.87517	1.87147	1.85857			1.881
3
Mn1	N1	1.95542	1.95792	1.97143			1.996
Mn1	N2	2.08188	2.06887	2.07114			2.062
Mn1	N3	2.08188	2.06887	2.07113			2.065
Mn1	N4	1.95543	1.95793	1.97143			1.998
Mn1	O1	1.87948	1.87223	1.86162			1.878
Mn1	O2	1.87948	1.87223	1.86162			1.887
Mn1	O1	1.87125	1.857	1.85237			1.872
Mn1	O2	1.87127	1.867	1.85244			1.874
Mn1	N1	2.07862	2.07915	2.0763			2.087
Mn1	N2	2.32165	2.278	2.29356			2.182
Mn1	N3	2.32113	2.278	2.28702			2.21
Mn1	N4	2.07985	2.079	2.08087			2.098
4
Mn1	O1	1.85053	1.871	1.86101			1.877
Mn1	O2	1.85059	1.871	1.8609			1.883
Mn1	N1	1.96728	1.959	1.97061			1.99
Mn1	N2	2.08379	2.072	2.07479			2.055
Mn1	N3	2.08392	2.072	2.07428			2.067
Mn1	N4	1.96736	1.959	1.97115			2.001
Mn1	C1	2.24739	2.27333	2.27426
Mn1	C2	2.24764	2.27336	2.27482
Mn1	C3	2.30105	2.31043	2.33571
Mn1	C4	2.30169	2.3109	2.33624
Mn1	C5	2.37288	2.37276	2.34281
Mn1	C7	2.37358	2.37335	2.34325
Mn1	C8	2.45327	2.42885	2.43624
Mn1	C9	2.45397	2.42905	2.43686
Mn1	C10	2.50795	2.4789	2.45295
Mn1	C11	2.50801	2.47932	2.45418
5
Mn1	C1	2.05616	2.05802	2.06594
Mn1	C2	2.05956	2.05805	2.06824
Mn1	C3	2.06063	2.05983	2.07079
Mn1	C4	2.06454	2.05985	2.07406
Mn1	C5	2.10821	2.06244	2.11464
Mn1	C7	2.1149	2.0625	2.12054
Mn1	C8	2.13162	2.06431	2.1399
Mn1	C9	2.13789	2.06436	2.14433
Mn1	C10	2.15283	2.07098	2.1564
Mn1	C11	2.15372	2.07106	2.15847
Mn1	C1	2.25662	2.28522	2.3
Mn1	C2	2.25663	2.28522	2.30004
Mn1	C3	2.29022	2.34264	2.34677
Mn1	C4	2.29025	2.34266	2.3468
Mn1	C5	2.39826	2.36425	2.36119
Mn1	C6	2.3983	2.36427	2.36124
Mn1	C7	2.42287	2.42669	2.40892
Mn1	C8	2.42289	2.42671	2.40898
Mn1	C9	2.49207	2.44674	2.42539
Mn1	C10	2.49209	2.44676	2.42541
6
Mn1	C1	2.05807	2.05708	2.06408			2.11682
Mn1	C2	2.05808	2.05709	2.06408			2.11682
Mn1	C3	2.06616	2.07031	2.07693			2.12216
Mn1	C4	2.06617	2.07031	2.07694			2.12216
Mn1	C5	2.10906	2.10994	2.11345			2.14372
Mn1	C6	2.10906	2.10994	2.11346			2.14372
Mn1	C7	2.13836	2.15183	2.15347			2.14961
Mn1	C8	2.13836	2.15184	2.15347			2.14961
Mn1	C9	2.15013	2.1582	2.16045			2.18653
Mn1	C10	2.15013	2.1582	2.16045			2.18653
Mn1	C1	2.44628	2.43175	2.31498
Mn1	C2	2.4845	2.4368	2.31498
Mn1	C3	2.38076	2.36569	2.31924
Mn1	C4	2.26723	2.3155	2.31925
Mn1	C5	2.28641	2.33111	2.37386
Mn1	C14	2.44628	2.43175	2.37386
Mn1	C15	2.4845	2.4368	2.40541
Mn1	C16	2.38076	2.36569	2.40541
Mn1	C17	2.26723	2.3155	2.42699
Mn1	C18	2.28641	2.33111	2.42699
7									two molecules asymmetric unit
Mn1	C1	2.05298	2.05514	2.06072			2.06823		2.06475	2.07172
Mn1	C2	2.05298	2.05514	2.06073			2.06823		2.06475	2.07172
Mn1	C3	2.07264	2.07414	2.07827			2.08979		2.09387	2.08572
Mn1	C4	2.07264	2.07414	2.07827			2.08979		2.09387	2.08572
Mn1	C5	2.12385	2.13226	2.12985			2.13399		2.1344	2.13357
Mn1	C14	2.12386	2.13226	2.12986			2.13399		2.1344	2.13357
Mn1	C15	2.16705	2.17336	2.16877			2.16878		2.17351	2.16406
Mn1	C16	2.16705	2.17337	2.16877			2.16878		2.17351	2.16406
Mn1	C17	2.16929	2.17695	2.17273			2.17919		2.17597	2.18241
Mn1	C18	2.16929	2.17695	2.17273			2.17919		2.17597	2.18241
Fe1	O1	1.94369	1.92679	1.91565
Fe1	O2	1.94339	1.92672	1.91558
Fe1	N1	2.11459	2.10359	2.1024
Fe1	N2	2.24595	2.22332	2.21541
Fe1	N3	2.24591	2.22341	2.21529
Fe1	N4	2.11468	2.10362	2.10252
8
Fe1	O1	1.88434	1.87715	1.87274
Fe1	O2	1.88437	1.87698	1.8715
Fe1	N1	1.95081	1.95265	1.957
Fe1	N2	2.03227	2.02692	2.03508
Fe1	N3	2.03224	2.02708	2.03447
Fe1	N4	1.9508	1.95203	1.95695
Fe1	O1	1.97744	1.95024	1.94058			1.91192
Fe1	O2	1.98231	1.95564	1.94421			1.93009
Fe1	N1	2.09256	2.08286	2.08328			2.06921
Fe1	N2	2.07811	2.0674	2.06879			2.016
Fe1	N3	2.21968	2.21082	2.19652			2.07857
Fe1	N4	2.19583	2.18167	2.17016			2.015
9
Fe1	O1	1.90682	1.8966	1.88748			1.92631
Fe1	O2	1.90589	1.89322	1.88347			1.89582
Fe1	N1	1.89929	1.90617	1.91198			1.91929
Fe1	N2	1.88531	1.88828	1.8965			1.91277
Fe1	N3	2.02268	2.01897	2.02805			1.98824
Fe1	N4	1.98764	1.99423	2.00869			1.96373
Fe1	O1	1.921	1.90537	1.89709			1.90375
Fe1	O3	1.921	1.9053	1.89773			1.93559
Fe1	N1	2.1217	2.10958	2.10686			2.11742
Fe1	N2	2.293	2.26097	2.26681			2.22346
Fe1	N3	2.1217	2.10955	2.10635			2.13855
Fe1	N4	2.293	2.2613	2.26804			2.23887
10
Fe1	O1	1.8668	1.85517	1.85424
Fe1	O3	1.86669	1.85557	1.85667
Fe1	N1	1.91085	1.9151	1.92509
Fe1	N2	2.06919	2.06578	2.07423
Fe1	N3	1.911	1.91498	1.9232
Fe1	N4	2.06952	2.0655	2.07336
Fe1	N1	2.17914	2.16987	2.1862			2.19824
Fe1	N2	2.17916	2.16988	2.1862			2.19824
Fe1	N3	2.23896	2.2214	2.21782			2.2123
Fe1	N4	2.23896	2.2214	2.21782			2.2123
Fe1	N5	1.98582	1.99327	2.00396			2.057
Fe1	N6	1.98584	1.99326	2.00396			2.057
11
Fe1	N1	1.93006	1.93729	1.9439			2.00502
Fe1	N2	1.93007	1.9373	1.94391			2.00502
Fe1	N3	1.93563	1.94262	1.94959			2.01372
Fe1	N4	1.93563	1.94263	1.94959			2.01372
Fe1	N5	1.92558	1.91926	1.92273			1.95679
Fe1	N6	1.9256	1.91927	1.92277			1.95679
Fe1	N1	2.01731	2.02174	2.02975			2.10956
Fe1	N2	2.01705	2.02069	2.02871			2.10167
Fe1	N3	2.21176	2.1987	2.1958			2.22113
Fe1	N4	2.21158	2.19849	2.19709			2.21495
Fe1	N5	2.21119	2.19826	2.19889			2.19822
Fe1	N6	2.21227	2.2	2.21462			2.23342
12
Fe1	N1	1.89908	1.9062	1.90705
Fe1	N2	1.89753	1.9051	1.9061
Fe1	N3	1.96135	1.96769	1.97359
Fe1	N4	1.96139	1.96743	1.97343
Fe1	N5	1.96174	1.96793	1.97546
Fe1	N6	1.9611	1.96732	1.97481
Fe1	N1	2.10952	2.10433	2.12179			2.12816
Fe1	N3	2.16297	2.16322	2.16919			2.20197
Fe1	N5	2.16328	2.16222	2.16786			2.1806
Fe1	N6	2.10958	2.10428	2.12026			2.12816
Fe1	N8	2.1628	2.16268	2.17286			2.19098
Fe1	N10	2.16282	2.16314	2.17346			2.1905
13
Fe1	N1	1.87923	1.88066	1.89287
Fe1	N3	1.94783	1.95545	1.97423
Fe1	N5	1.94763	1.95528	1.97147
Fe1	N6	1.87925	1.88077	1.97131
Fe1	N8	1.94776	1.95529	1.97183
Fe1	N10	1.94775	1.95559	1.89405
Fe1	N1	2.13861	2.13359	2.14296			2.1573
Fe1	N2	2.13861	2.13357	2.143			2.1573
Fe1	N3	2.19216	2.18577	2.17686			2.21361
Fe1	N4	2.19216	2.18577	2.17684			2.21361
Fe1	N5	2.13259	2.12979	2.12698			2.18923
Fe1	N6	2.13259	2.1298	2.12696			2.18923
14
Fe1	N1	1.92154	1.93064	1.942			2.01275
Fe1	N2	1.92153	1.93063	1.94198			2.01275
Fe1	N3	1.99304	1.99701	1.99984			2.04521
Fe1	N4	1.99304	1.99702	1.99984			2.04521
Fe1	N5	1.98447	1.98564	1.99197			2.03888
Fe1	N6	1.98445	1.98561	1.99197			2.03888
Fe1	N1	2.19977	2.20583	2.22072
Fe1	N2	2.20017	2.20577	2.22073
Fe1	N5	2.02419	2.03468	2.0257
Fe1	N6	2.02414	2.03457	2.02573
Fe1	N7	2.17829	2.17236	2.19993
Fe1	N8	2.17799	2.1723	2.19997
15
Fe1	N1	1.92613	1.93406	1.9511			1.96343
Fe1	N2	1.92564	1.93397	1.9486			1.96775
Fe1	N5	1.91498	1.92047	1.90964			1.88581
Fe1	N6	1.8945	1.90195	1.902			1.94816
Fe1	N7	1.97209	1.97554	1.99431			1.96343
Fe1	N8	1.97232	1.97579	1.99405			1.98221
Co1	N1	2.03819	2.03949	2.048			1.9434
Co1	N2	2.03613	2.03889	2.04711			1.9434
Co1	N3	2.15098	2.15201	2.15787			2.1042
Co1	N4	2.12032	2.12162	2.13307			2.1042
Co1	N5	2.15428	2.15375	2.15882			2.1042
Co1	N6	2.12148	2.12284	2.13481			2.1042
16
Co1	N1	1.92391	1.91683	1.92826			1.91312
Co1	N2	1.84392	1.84301	1.84866			1.91312
Co1	N3	2.16336	2.16449	2.16722			2.08269
Co1	N4	2.16355	2.16233	2.17338			2.08269
Co1	N5	1.95966	1.96711	1.97277			2.08269
Co1	N6	1.95966	1.96629	1.96934			2.08269
Co1	O1	2.01804	2.00796	1.99801			2.02182
Co1	N1	2.06655	2.06139	2.07566			2.12269
Co1	N2	2.17111	2.17628	2.17578			2.26222
Co1	O4	1.96521	1.96408	1.96883			2.02182
Co1	N3	2.06281	2.05658	2.05909			2.12269
Co1	N4	2.17212	2.17798	2.1701			2.26222
17
Co1	O1	1.9337	1.91763	1.89718
Co1	N1	1.87756	1.87468	1.87978
Co1	N2	2.24098	2.2544	2.25896
Co1	O4	1.89764	1.8852	1.87286
Co1	N3	1.87477	1.87237	1.87545
Co1	N4	2.24859	2.26045	2.2641
Co1	N1	2.032	2.03691	2.04372			1.9926
Co1	N2	2.03209	2.03693	2.04377			1.99534
Co1	N3	2.13535	2.15886	2.16308			2.15322
Co1	N4	2.13247	2.12778	2.14132			2.10533
Co1	N5	2.13249	2.12779	2.14132			2.12233
Co1	N6	2.13535	2.15888	2.16312			2.14336
18
Co1	N1	1.84697	1.84712	1.85099
Co1	N2	1.92534	1.91807	1.91724
Co1	N3	2.16366	2.16294	2.16113
Co1	N4	2.16649	2.16604	2.16797
Co1	N5	1.95948	1.96791	1.97742
Co1	N6	1.95977	1.97038	1.98326
Co1	O1	2.05887	2.05043	2.05641			2.04226
Co1	O2	2.0294	2.02711	2.01806			1.90918
Co1	N1	2.03288	2.04176	2.06314			1.92199
Co1	N3	2.1003	2.10708	2.11754			2.07859
Co1	N4	2.03701	2.04182	2.06187			2.01117
Co1	N6	2.05632	2.06557	2.08385			2.04156
19
Co1	O1	1.91821	1.89682	1.88307			1.96848
Co1	O2	1.91759	1.89664	1.88395			1.99827
Co1	N1	1.86595	1.85758	1.86007			1.86506
Co1	N3	1.90325	1.90117	1.90423			2.04779
Co1	N4	1.86579	1.85751	1.86072			1.91277
Co1	N6	1.90253	1.90133	1.90528			2.12237
Co1	N1	2.11615	2.11694	2.11786
Co1	N2	2.05726	2.04959	2.0539
Co1	N3	2.11801	2.1218	2.1266
Co1	N4	2.14603	2.15141	2.16016
Co1	N5	2.01504	2.0152	2.02135
Co1	N6	2.14762	2.15153	2.16265
20
Co1	N1	2.1619	2.16351	2.16736			2.14216
Co1	N2	1.92348	1.91766	1.92762			1.92762
Co1	N3	2.16396	2.16545	2.1762			2.12126
Co1	N4	1.96124	1.96956	1.97266			2.05227
Co1	N5	1.84698	1.84648	1.85118			1.9031
Co1	N6	1.96024	1.9684	1.97497			2.04544
