# Supplementary material for: Accurate state energetics in spin-crossover systems using pure density functional theory
Source: Royal Society of Chemistry journal article supplement (doi:10.1039/d4dt00975d), 2024-01-01
Supplement: d4dt00975d3.pdf [file d4dt00975d3.pdf]

# Accurate State Energetics in Spin-Crossover Systems using Pure Density Functional Theory

Silvia Gómez-Coca and Eliseo Ruiz

Departament de Química Inorgànica i Orgànica and Institut de Recerca de Química Teòrica i Computacional, Universitat de Barcelona,  
Diagonal 645, 08028 Barcelona, Spain

## Electronic Supplementary Information

|                                                                                                                 |         |
|-----------------------------------------------------------------------------------------------------------------|---------|
| Table S1 High- and low-spin energy differences of the KTBM family of meta-GGA exchange-correlation functionals. | Pag. S2 |
| Table S2 Normalized training weights for the KBTM meta-GGA family of exchange functionals.                      | Pag. S3 |
| Table S3 Calculated electronic energies to reproduce the experimental transition temperatures.                  | Pag. S4 |
| Table S4 High- and low-spin energy differences of bandgap dedicated meta-GGA functionals.                       | Pag. S5 |
| References                                                                                                      | Pag. S6 |

A text file containing xyz files with the optimized structures and an xlsx file with the calculated and experimental bond distances.

**Table S1.** High- and low-spin energy differences (in kcal/mol) using s1-s20 molecular models (positive values indicate a low-spin ground state) using the twenty-five KTBM0-KTBM24 exchange functionals + SCAN correlation using PBE+MB optimized geometry. The last row has the sum of energy differences. The functionals with the best results are highlighted in bold.

| KTBM | 0     | 1     | 2     | 3     | 4     | 5     | 6     | 7     | 8     | 9     | 10    | 11    | 12    | 13    | 14          | 15    | 16    | 17    | 18    | 19          | 20    | 21    | 22    | 23    | 24          | GAP   |
|------|-------|-------|-------|-------|-------|-------|-------|-------|-------|-------|-------|-------|-------|-------|-------------|-------|-------|-------|-------|-------------|-------|-------|-------|-------|-------------|-------|
| s1   | 13.1  | 12.9  | 12.2  | 9.6   | 13.0  | 14.1  | 13.2  | 11.0  | 8.9   | 8.8   | 12.3  | 11.5  | 9.9   | 7.7   | <b>6.6</b>  | 11.2  | 10.4  | 8.6   | 6.9   | <b>6.2</b>  | 9.2   | 8.2   | 7.4   | 6.4   | <b>5.8</b>  | -6.6  |
| s2   | 13.3  | 13.1  | 12.1  | 8.1   | 9.4   | 13.8  | 13.2  | 10.8  | 7.4   | 6.1   | 12.8  | 12.0  | 10.0  | 7.1   | <b>5.3</b>  | 12.3  | 11.5  | 9.1   | 6.6   | <b>5.3</b>  | 10.2  | 8.9   | 7.7   | 6.2   | <b>4.8</b>  | -11.2 |
| s3   | 13.6  | 13.4  | 12.4  | 8.5   | 9.7   | 14.1  | 13.6  | 11.4  | 8.0   | 6.8   | 13.5  | 12.8  | 10.9  | 8.1   | <b>6.4</b>  | 13.4  | 12.6  | 10.4  | 7.8   | <b>6.5</b>  | 11.6  | 10.3  | 9.1   | 7.5   | <b>5.7</b>  | -11.0 |
| s4   | 11.4  | 11.2  | 10.2  | 6.2   | 7.2   | 11.8  | 11.4  | 9.1   | 5.7   | 4.5   | 11.4  | 10.6  | 8.8   | 6.0   | <b>4.3</b>  | 11.3  | 10.6  | 8.4   | 5.8   | <b>4.5</b>  | 9.6   | 8.3   | 7.1   | 5.5   | <b>3.5</b>  | -13.4 |
| s5   | 25.1  | 24.8  | 23.6  | 18.4  | 21.3  | 26.9  | 25.5  | 21.5  | 17.1  | 15.0  | 24.2  | 22.8  | 19.7  | 15.1  | <b>12.2</b> | 22.7  | 21.0  | 17.5  | 13.8  | <b>11.9</b> | 18.5  | 16.6  | 15.0  | 12.9  | <b>9.7</b>  | -11.9 |
| s6   | 27.0  | 26.7  | 25.4  | 19.7  | 22.6  | 28.6  | 27.2  | 23.0  | 18.3  | 16.3  | 25.9  | 24.5  | 21.1  | 16.5  | <b>13.6</b> | 24.3  | 22.6  | 18.9  | 15.2  | <b>13.3</b> | 20.0  | 18.1  | 16.4  | 14.3  | <b>11.4</b> | -11.0 |
| s7   | 27.4  | 27.1  | 25.7  | 19.7  | 22.2  | 28.8  | 27.4  | 23.2  | 18.3  | 16.1  | 26.2  | 24.7  | 21.3  | 16.5  | <b>13.6</b> | 24.6  | 22.9  | 19.0  | 15.2  | <b>13.3</b> | 20.2  | 18.2  | 16.5  | 14.4  | <b>11.6</b> | -11.4 |
| s8   | 21.5  | 21.1  | 19.4  | 12.0  | 11.9  | 22.1  | 21.4  | 17.5  | 11.2  | 8.1   | 21.6  | 20.4  | 17.1  | 12.0  | <b>8.9</b>  | 21.9  | 20.6  | 16.5  | 12.0  | <b>9.4</b>  | 18.7  | 16.4  | 14.4  | 11.5  | <b>7.2</b>  | -21.2 |
| s9   | 29.1  | 28.7  | 26.9  | 19.3  | 20.5  | 29.9  | 28.9  | 24.5  | 18.3  | 15.5  | 28.6  | 27.2  | 23.7  | 18.4  | <b>15.3</b> | 28.3  | 26.8  | 22.6  | 18.0  | <b>15.6</b> | 24.7  | 22.3  | 20.2  | 17.3  | <b>13.8</b> | -15.7 |
| s10  | 24.1  | 23.7  | 22.0  | 14.7  | 15.5  | 24.9  | 24.0  | 19.9  | 13.8  | 11.1  | 23.9  | 22.6  | 19.3  | 14.3  | <b>11.3</b> | 23.9  | 22.6  | 18.5  | 14.1  | <b>11.7</b> | 20.6  | 18.4  | 16.4  | 13.5  | <b>9.5</b>  | -19.2 |
| s11  | 17.5  | 17.2  | 15.9  | 10.4  | 13.6  | 18.9  | 17.5  | 13.6  | 9.0   | 7.2   | 16.2  | 14.9  | 11.8  | 7.4   | <b>4.7</b>  | 14.7  | 13.2  | 9.8   | 6.1   | <b>4.4</b>  | 11.0  | 9.1   | 7.4   | 5.3   | <b>3.6</b>  | -20.3 |
| s12  | 20.2  | 19.9  | 18.4  | 12.3  | 16.3  | 21.6  | 20.2  | 16.1  | 11.1  | 9.8   | 19.1  | 17.7  | 14.6  | 9.9   | <b>7.4</b>  | 17.8  | 16.3  | 12.7  | 8.8   | <b>7.1</b>  | 14.3  | 12.1  | 10.3  | 8.0   | <b>6.2</b>  | -21.8 |
| s13  | 22.3  | 22.0  | 20.7  | 15.6  | 19.7  | 24.0  | 22.4  | 18.3  | 14.1  | 12.7  | 20.7  | 19.2  | 16.2  | 11.8  | <b>9.3</b>  | 18.8  | 17.2  | 13.8  | 10.3  | <b>8.8</b>  | 14.9  | 12.9  | 11.4  | 9.5   | <b>8.2</b>  | -14.3 |
| s14  | 23.7  | 23.4  | 21.8  | 15.4  | 18.5  | 25.0  | 23.6  | 19.2  | 14.0  | 12.3  | 22.4  | 20.9  | 17.6  | 12.8  | <b>10.3</b> | 21.0  | 19.4  | 15.7  | 11.7  | <b>10.0</b> | 17.2  | 15.1  | 13.2  | 11.0  | <b>9.3</b>  | -17.5 |
| s15  | 14.1  | 13.9  | 12.9  | 8.4   | 12.0  | 15.3  | 14.0  | 10.7  | 6.9   | 5.8   | 12.5  | 11.4  | 8.9   | 5.0   | <b>2.7</b>  | 10.8  | 9.6   | 6.7   | 3.5   | <b>2.2</b>  | 7.7   | 6.0   | 4.5   | 2.9   | <b>2.8</b>  | -18.6 |
| s16  | 12.7  | 12.6  | 12.0  | 9.5   | 12.6  | 14.2  | 12.7  | 9.6   | 7.8   | 6.9   | 10.4  | 9.3   | 7.1   | 4.3   | <b>2.9</b>  | 7.6   | 6.2   | 4.0   | 2.4   | <b>2.1</b>  | 3.9   | 2.9   | 2.2   | 1.8   | <b>2.3</b>  | -6.1  |
| s17  | 11.7  | 11.5  | 11.0  | 8.3   | 9.9   | 12.6  | 11.6  | 9.0   | 7.0   | 5.9   | 10.0  | 9.1   | 7.1   | 4.7   | <b>3.4</b>  | 8.1   | 6.9   | 4.9   | 3.3   | <b>2.9</b>  | 5.0   | 4.1   | 3.4   | 2.9   | <b>2.8</b>  | -5.6  |
| s18  | 12.1  | 12.0  | 11.4  | 8.7   | 11.6  | 13.6  | 12.1  | 8.9   | 7.0   | 5.9   | 9.8   | 8.7   | 6.4   | 3.5   | <b>2.0</b>  | 7.1   | 5.6   | 3.3   | 1.6   | <b>1.1</b>  | 3.3   | 2.2   | 1.4   | 0.9   | <b>1.3</b>  | -7.4  |
| s19  | 16.7  | 16.6  | 16.1  | 14.0  | 18.2  | 18.4  | 16.9  | 14.0  | 12.5  | 12.2  | 14.7  | 13.6  | 11.7  | 9.2   | <b>8.1</b>  | 12.2  | 10.8  | 8.9   | 7.4   | <b>7.2</b>  | 8.9   | 7.9   | 7.2   | 6.7   | <b>7.1</b>  | -3.4  |
| s20  | 19.5  | 14.9  | 14.3  | 11.5  | 14.0  | 16.3  | 15.1  | 12.4  | 10.3  | 9.3   | 13.6  | 12.7  | 10.7  | 8.1   | <b>6.7</b>  | 11.9  | 10.7  | 8.7   | 6.9   | <b>6.2</b>  | 9.0   | 7.9   | 7.1   | 6.3   | <b>5.7</b>  | -4.7  |
| sum  | 376.1 | 366.6 | 344.4 | 250.1 | 299.4 | 394.8 | 371.8 | 303.8 | 226.8 | 196.3 | 349.7 | 326.4 | 273.9 | 198.3 | 154.8       | 323.9 | 297.5 | 238.0 | 177.3 | 149.6       | 258.5 | 225.9 | 198.3 | 164.5 | 132.3       | -     |

**Table S2.** Normalized training weights for the KBTM meta-GGA family of exchange functionals (from SI of ref.1)

| functional | w lattice parameter | w cohesive energy | w bandgap |
|------------|---------------------|-------------------|-----------|
| KTBM0      | 0.0                 | 1.0               | 0.0       |
| KTBM1      | 0.32                | 0.95              | 0.0       |
| KTBM2      | 0.71                | 0.71              | 0.0       |
| KTBM3      | 0.95                | 0.32              | 0.0       |
| KTBM4      | 1.0                 | 0.0               | 0.0       |
| KTBM5      | 0.0                 | 0.97              | 0.02      |
| KTBM6      | 0.3                 | 0.9               | 0.03      |
| KTBM7      | 0.67                | 0.67              | 0.03      |
| KTBM8      | 0.9                 | 0.3               | 0.03      |
| KTBM9      | 0.97                | 0.0               | 0.02      |
| KTBM10     | 0.0                 | 0.83              | 0.06      |
| KTBM11     | 0.24                | 0.73              | 0.06      |
| KTBM12     | 0.51                | 0.51              | 0.07      |
| KTBM13     | 0.73                | 0.24              | 0.06      |
| KTBM14     | 0.83                | 0.0               | 0.06      |
| KTBM15     | 0.0                 | 0.55              | 0.08      |
| KTBM16     | 0.15                | 0.44              | 0.09      |
| KTBM17     | 0.3                 | 0.3               | 0.09      |
| KTBM18     | 0.44                | 0.15              | 0.09      |
| KTBM19     | 0.55                | 0.0               | 0.08      |
| KTBM20     | 0.0                 | 0.24              | 0.1       |
| KTBM21     | 0.06                | 0.18              | 0.1       |
| KTBM22     | 0.12                | 0.12              | 0.1       |
| KTBM23     | 0.18                | 0.06              | 0.1       |
| KTBM24     | 0.24                | 0.0               | 0.1       |
| KTBM_GAP   | 0.019               | 0.0062            | 0.1       |

**Table S3.** Experimental transition temperatures  $T_{1/2}$  (in K). Estimation of the difference of the electronic energy to reproduce the experimental  $T_{1/2}$ . Such value can be calculated as the difference of thermal corrections to free energy (thermal corrections to translational, rotational and electronic energy + zero-point correction + translational, rotational and electronic entropy). Two DFT methods<sup>2-3</sup> has been adopted by changing functional, basis set<sup>4,5,6</sup> and dispersion contribution<sup>7</sup> to check the relatively small changes with the methodology. For the discussion in the main text, the B3LYP values will be employed because such approach was benchmarked as the best to reproduce the vibrational frequencies that are the main contribution to such energy difference through the zero-point correction and entropic terms.<sup>8</sup>

| <b>Molecular System</b>                                                                          | <b>ref.</b> | <b>Exp. <math>T_{1/2}</math></b> | <b>B3LYP+GD3<br/>6-311G</b> | <b>TPSSh<br/>def2-TZVP</b> |
|--------------------------------------------------------------------------------------------------|-------------|----------------------------------|-----------------------------|----------------------------|
| <b>s1</b> [Cr <sup>II</sup> (L <sub>s1</sub> ) <sub>2</sub> l <sub>2</sub> ]                     | 9           | 171                              | 1.7                         | 2.5                        |
| <b>s2</b> [Mn <sup>III</sup> (L <sub>s2</sub> )]                                                 | 10, 11      | 45                               | 1.2                         | 1.2                        |
| <b>s3</b> [Mn <sup>III</sup> (L <sub>s3</sub> ) <sup>+1</sup> ]                                  | 12          | 175                              | 2.7                         | 2.8                        |
| <b>s4</b> [Mn <sup>III</sup> (L <sub>s4</sub> ) <sup>+1</sup> ]                                  | 13          | 131                              | 2.3                         | 2.4                        |
| <b>s5</b> [Mn <sup>II</sup> (L <sub>s5</sub> ) <sub>2</sub> ]                                    | 14          | 303                              | 7.9                         | 7.4                        |
| <b>s6</b> [Mn <sup>II</sup> (L <sub>s6</sub> ) <sub>2</sub> ]                                    | 15          | 215                              | 6.4                         | 5.8                        |
| <b>s7</b> [Mn <sup>II</sup> (L <sub>s7</sub> ) <sub>2</sub> ]                                    | 15          | 325                              | 8.3                         | 7.0                        |
| <b>s8</b> [Fe <sup>III</sup> (L <sub>s8</sub> ) <sup>+1</sup> ]                                  | 16          | 200                              | 2.9                         | 3.6                        |
| <b>s9</b> [Fe <sup>III</sup> (L <sub>s9a</sub> )(L <sub>s9b</sub> ) <sub>2</sub> ] <sup>+1</sup> | 17          | 200                              | 4.0                         | 5.1                        |
| <b>s10</b> [Fe <sup>III</sup> (L <sub>s10</sub> ) <sub>2</sub> ] <sup>+1</sup>                   | 18          | 164                              | 3.1                         | 3.9                        |
| <b>s11</b> [Fe <sup>II</sup> (L <sub>s11</sub> ) <sub>2</sub> (NCS) <sub>2</sub> ]               | 19          | 176.5                            | 4.3                         | 4.7                        |
| <b>s12</b> [Fe(L <sub>s12</sub> ) <sub>4</sub> (NCS) <sub>2</sub> ]                              | 20          | 109                              | 5.4                         | 5.1                        |
| <b>s13</b> [Fe <sup>II</sup> (L <sub>s13</sub> ) <sub>2</sub> ] <sup>+2</sup>                    | 21          | 256                              | 5.3                         | 5.9                        |
| <b>s14</b> [Fe <sup>II</sup> (L <sub>s14a</sub> )(L <sub>s14b</sub> )]                           | 22          | 160                              | 4.0                         | 4.7                        |
| <b>s15</b> [Fe <sup>II</sup> (L <sub>s15</sub> ) <sub>2</sub> (NCS) <sub>2</sub> ]               | 23          | 118                              | 1.7                         | 3.4                        |
| <b>s16</b> [Co <sup>II</sup> (L <sub>s16</sub> ) <sub>2</sub> ] <sup>+2</sup>                    | 24          | 200                              | 2.0                         | 2.3                        |
| <b>s17</b> [Co <sup>II</sup> (L <sub>s17</sub> )(py) <sub>2</sub> ]                              | 25          | 121                              | 1.2                         | 1.3                        |
| <b>s18</b> [Co <sup>II</sup> (L <sub>s18</sub> ) <sub>2</sub> ] <sup>+2</sup>                    | 26          | 172.4                            | 1.6                         | 1.9                        |
| <b>s19</b> [Co <sup>II</sup> (L <sub>s19</sub> ) <sub>2</sub> ]                                  | 27          | 150                              | 1.5                         | 2.1                        |
| <b>s20</b> [Co <sup>II</sup> (L <sub>s20</sub> ) <sub>2</sub> ] <sup>+2</sup>                    | 28          | 250                              | 1.7                         | 1.9                        |

**Table S4.** High- and low-spin states energy differences (in kcal/mol, positive values indicate a low-spin ground state) calculated with exchange-correlation functionals especially devoted to reproduce bandgaps including the KTBM\_GAP functional with large weight for the bandgap error proposed by Kovács et al. <sup>1</sup>

| <b>Molecular System</b>                                                                          | <b>ref.</b> | <b>KTBM_GAP<br/>// PBE+MB</b> | <b>TASK<br/>//PBE+MB</b> | <b>mBEEF<br/>// PBE+MB</b> | <b>HLE17<br/>// PBE+MB</b> |
|--------------------------------------------------------------------------------------------------|-------------|-------------------------------|--------------------------|----------------------------|----------------------------|
| <b>s1</b> [Cr <sup>II</sup> (L <sub>s1</sub> ) <sub>2</sub> l <sub>2</sub> ]                     | 9           | -6.6                          | -28.7                    | 5.2                        | -6.3                       |
| <b>s2</b> [Mn <sup>III</sup> (L <sub>s2</sub> )]                                                 | 10, 11      | -11.2                         | -27.3                    | 4.4                        | -3.0                       |
| <b>s3</b> [Mn <sup>III</sup> (L <sub>s3</sub> )] <sup>+1</sup>                                   | 12          | -11.0                         | -27.3                    | 3.3                        | -4.6                       |
| <b>s4</b> [Mn <sup>III</sup> (L <sub>s4</sub> )] <sup>+1</sup>                                   | 13          | -13.4                         | -30.0                    | 1.0                        | -6.8                       |
| <b>s5</b> [Mn <sup>II</sup> (L <sub>s5</sub> ) <sub>2</sub> ]                                    | 14          | -11.9                         | -30.7                    | 13.1                       | -1.0                       |
| <b>s6</b> [Mn <sup>II</sup> (L <sub>s6</sub> ) <sub>2</sub> ]                                    | 15          | -11.0                         | -34.5                    | 13.6                       | -1.9                       |
| <b>s7</b> [Mn <sup>II</sup> (L <sub>s7</sub> ) <sub>2</sub> ]                                    | 15          | -11.4                         | -37.3                    | 12.4                       | -1.9                       |
| <b>s8</b> [Fe <sup>III</sup> (L <sub>s8</sub> )] <sup>+1</sup>                                   | 16          | -21.2                         | -43.5                    | 9.2                        | 2.3                        |
| <b>s9</b> [Fe <sup>III</sup> (L <sub>s9a</sub> )(L <sub>s9b</sub> ) <sub>2</sub> ] <sup>+1</sup> | 17          | -15.7                         | -43.7                    | 14.9                       | 5.6                        |
| <b>s10</b> [Fe <sup>III</sup> (L <sub>s10</sub> ) <sub>2</sub> ] <sup>+1</sup>                   | 18          | -19.2                         | -29.7                    | 11.4                       | 1.8                        |
| <b>s11</b> [Fe <sup>II</sup> (L <sub>s11</sub> ) <sub>2</sub> (NCS) <sub>2</sub> ]               | 19          | -20.3                         | -35.3                    | 12.8                       | 0.0                        |
| <b>s12</b> [Fe(L <sub>s12</sub> ) <sub>4</sub> (NCS) <sub>2</sub> ]                              | 20          | -21.8                         | -46.9                    | 12.7                       | -4.8                       |
| <b>s13</b> [Fe <sup>II</sup> (L <sub>s13</sub> ) <sub>2</sub> ] <sup>+2</sup>                    | 21          | -14.3                         | -27.3                    | 20.4                       | 2.3                        |
| <b>s14</b> [Fe <sup>II</sup> (L <sub>s14a</sub> )(L <sub>s14b</sub> )]                           | 22          | -17.5                         | -40.6                    | 17.7                       | 1.7                        |
| <b>s15</b> [Fe <sup>II</sup> (L <sub>s15</sub> ) <sub>2</sub> (NCS) <sub>2</sub> ]               | 23          | -18.6                         | -33.6                    | 11.5                       | 1.4                        |
| <b>s16</b> [Co <sup>II</sup> (L <sub>s16</sub> ) <sub>2</sub> ] <sup>+2</sup>                    | 24          | -6.1                          | -6.9                     | 13.5                       | 0.8                        |
| <b>s17</b> [Co <sup>II</sup> (L <sub>s17</sub> )(py) <sub>2</sub> ]                              | 25          | -5.6                          | -8.9                     | 12.0                       | 0.4                        |
| <b>s18</b> [Co <sup>II</sup> (L <sub>s18</sub> ) <sub>2</sub> ] <sup>+2</sup>                    | 26          | -7.4                          | -8.1                     | 13.3                       | 0.2                        |
| <b>s19</b> [Co <sup>II</sup> (L <sub>s19</sub> ) <sub>2</sub> ]                                  | 27          | -3.4                          | -7.3                     | 24.1                       | 2.0                        |
| <b>s20</b> [Co <sup>II</sup> (L <sub>s20</sub> ) <sub>2</sub> ] <sup>+2</sup>                    | 28          | -4.7                          | -8.7                     | 12.3                       | 3.9                        |

## References

1. P. Kovács, F. Tran, P. Blaha and G. K. H. Madsen, *J. Chem. Phys.*, 2022, **157**, 094110.
2. A. D. Becke, *J. Chem. Phys.*, 1993, **98**, 5648.
3. J. M. Tao, J. P. Perdew, V. N. Staroverov and G. E. Scuseria, *Phys. Rev. Lett.*, 2003, **91**, 146401.
4. A. D. McLean and G. S. Chandler, *J. Chem. Phys.*, 1980, **72**, 5639.
5. K. Raghavachari and G. W. Trucks, *J. Chem. Phys.*, 1989, **91**, 1062.
6. F. Weigend and R. Ahlrichs, *Phys.Chem.Chem.Phys.*, 2005, **7**, 3297.
7. S. Grimme, J. Antony, S. Ehrlich and H. Krieg, *J. Chem. Phys.*, 2010, **132**, 154104.
8. A. P. Scott and L. Radom, *J. Phys. Chem.*, 1996, **100**, 16502.
9. D. M. Halepoto, D. G. L. Holt, L. F. Larkworthy, G. J. Leigh, D. C. Povey and G. W. Smith, *J. Chem. Soc.-Chem. Commun.*, 1989, 1322.
10. P. G. Sim and E. Sinn, *J. Am. Chem. Soc.*, 1981, **103**, 241.
11. P. Guionneau, M. Marchivie, Y. Garcia, J. A. K. Howard and D. Chasseau, *Phys. Rev.B*, 2005, **72**, 214408.
12. K. Pandurangan, B. Gildea, C. Murray, C. J. Harding, H. Mueller-Bunz and G. G. Morgan, *Chem. Eur. J.* 2012, **18**, 2021.
13. P. N. Martinho, B. Gildea, M. M. Harris, T. Lemma, A. D. Naik, H. Mueller-Bunz, T. E. Keyes, Y. Garcia and G. G. Morgan, *Angew. Che. Int. E.* 2012, **51**, 12597.
14. M. E. Switzer, R. Wang, M. F. Rettig and A. H. Maki, *J. Am. Chem. Soc.*, 1974, **96**, 7669.
15. M. D. Walter, C. D. Sofield, C. H. Booth and R. A. Andersen, *Organometallics*, 2009, **28**, 2005.
16. E. V. Dose, K. M. M. Murphy and L. J. Wilson, *Inorg. Chem.*, 1976, **15**, 2622.
17. Y. Maeda, H. Oshio, K. Toriumi and Y. Takashima, *J. Chem. Soc.-Dalton Trans.*, 1991, 1227.
18. A. Tissot, R. Bertoni, E. Collet, L. Toupet and M.-L. Boillot, *J. Mater. Chem.*, 2011, **21**, 18347.
19. B. Gallois, J. A. Real, C. Hauw and J. Zarembowitch, *Inorg. Chem.*, 1990, **29**, 1152.
20. C. Roux, J. Zarembowitch, B. Gallois, T. Granier and R. Claude, *Inorg. Chem.*, 1994, **33**, 2273.
21. C. Carbonera, C. A. Kilner, J.-F. Letard and M. A. Halcrow, *Dalton Trans.*, 2007, 1284.
22. J. A. Real, M. C. Muñoz, J. Faus and X. Solans, *Inorg. Chem.*, 1997, **36**, 3008.
23. C.-F. Sheu, K. Chen, S.-M. Chen, Y.-S. Wen, G.-H. Lee, J.-M. Chen, J.-F. Lee, B.-M. Cheng, H.-S. Sheu, N. Yasuda, Y. Ozawa, K. Toriumi and Y. Wang, *Chem. Eur. J.*, 2009, **15**, 2384.
24. B. N. Figgis, E. S. Kucharski and A. H. White, *Aust. J. Chem.*, 1983, **36**, 1527.
25. J. Zarembowitch and O. Kahn, *Inorg. Chem.*, 1984, **23**, 589.
26. A. B. Gaspar, M. C. Muñoz, V. Niel and J. A. Real, *Inorg. Chem.*, 2001, **40**, 9.
27. R. A. Taylor, A. J. Lough and M. T. Lemaire, *J. Mater. Chem. C*, 2016, **4**, 455.
28. S. Hayami, M. Nakaya, H. Ohmagari, A. S. Alao, M. Nakamura, R. Ohtani, R. Yamaguchi, T. Kuroda-Sowa and J. K. Clegg, *Dalton Trans.*, 2015, **44**, 9345.
